# Supplementary material for: Three-dimensional porous graphene-based composite materials: electrochemical synthesis and application
Source: Royal Society of Chemistry journal article supplement (doi:10.1039/c2jm34816k), 2012-01-01
Supplement: c2jm34816k.pdf [file c2jm34816k.pdf]

**Electronic Supplementary Information**

**Three-Dimensional (3D) Porous Graphene-Based Composite**

**Materials: Electrochemical Synthesis and Application**

Kaiwu Chen, Libin Chen, Yunqiang Chen, Hua Bai\* and Lei Li\*

College of Materials, Xiamen University, Xiamen, 361005, P. R. China

To whom coresponding should be addressed: [baihua@xmu.edu.cn](mailto:baihua@xmu.edu.cn) (H. Bai),

[lilei@xmu.edu.cn](mailto:lilei@xmu.edu.cn) (L. Li)

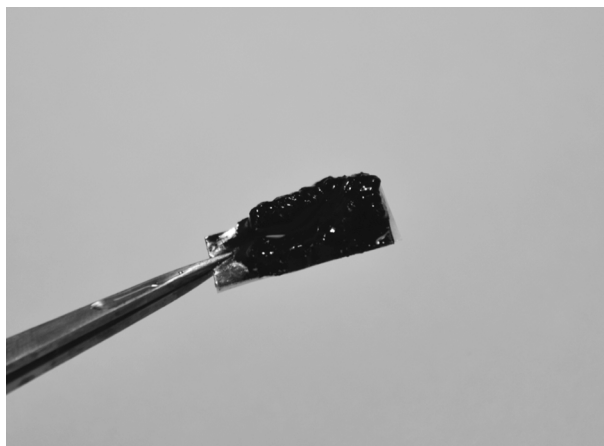

**Figure S1.** The optical image of ERGO@platinum foil.

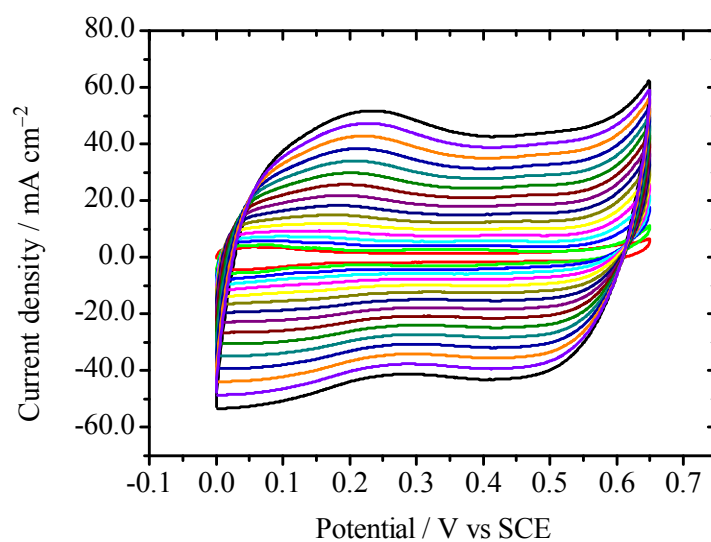

**Figure S2.** Cyclic voltammogram of 0.5 M aniline in an aqueous solution containing 0.6 M H<sub>2</sub>SO<sub>4</sub> with ERGO as working electrode at a scan rate of 50 mV s<sup>-1</sup>. The curve was shown every ten cycles.

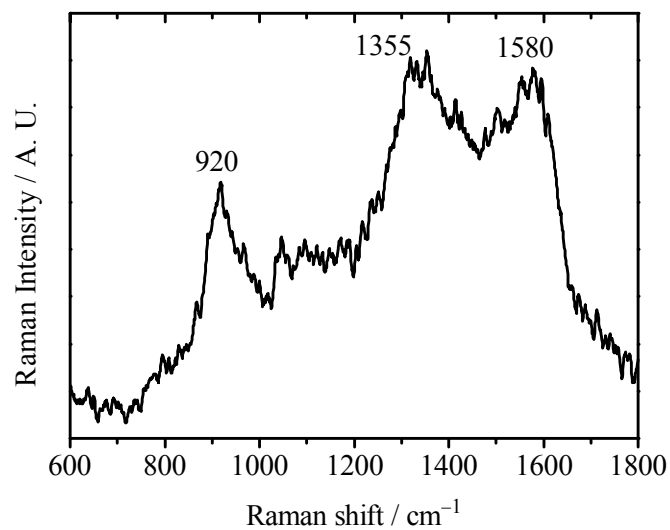

**Figure S3.** Raman spectrum of ERGO/PPy composite.

The Raman intensity is weak due to high roughness of the ERGO/PPy surface and low PPy content. However, three characterized Raman bands of PPy can be distinguished. The 1580 cm<sup>-1</sup> band is assigned to the C=C stretching mode of PPy backbones, and the bands around 1383 cm<sup>-1</sup> are associated with the ring stretching of PPy. Bands at 933 cm<sup>-1</sup> is assigned to the ring deformation related to polarons.
